# Supplementary material for: Hexanuclear copper–nickel and copper–cobalt complexes for thin film deposition of ceramic oxide composites
Source: Royal Society of Chemistry journal article supplement (doi:10.1039/c2nj20789c), 2012-01-01
Supplement: c2nj20789c.pdf [file c2nj20789c.pdf]

## *Supporting Information*

### **Hexanuclear copper-nickel and copper-cobalt complexes for thin film deposition of ceramic oxide composites**

*Muhammad Sultan,<sup>a</sup> Asif Ali Tahir,<sup>c</sup> Muhammad Mazhar,<sup>b\*</sup> Mathias Zeller,<sup>d</sup> K. G. Upul  
Wijayantha,<sup>c</sup>*

<sup>a</sup>Department of Chemistry, Quaid-I-Azam University, Islamabad-45320, Pakistan,

<sup>b</sup>Department of Chemistry, Faculty of Science, University of Malaya, Lambah Pantai, Kuala Lumpur 50603, Malaysia, <sup>c</sup>Department of Chemistry, University of Loughborough,

Loughborough LE11 3TU, UK. <sup>d</sup>STaRBURSTT-Cyberdiffraction Consortium at YSU and Department of Chemistry, Youngstown State University, 1 University Plaza, Youngstown, Ohio 44555-3663,

Corresponding Author: e-mail: [mazhar42pk@yahoo.com](mailto:mazhar42pk@yahoo.com)

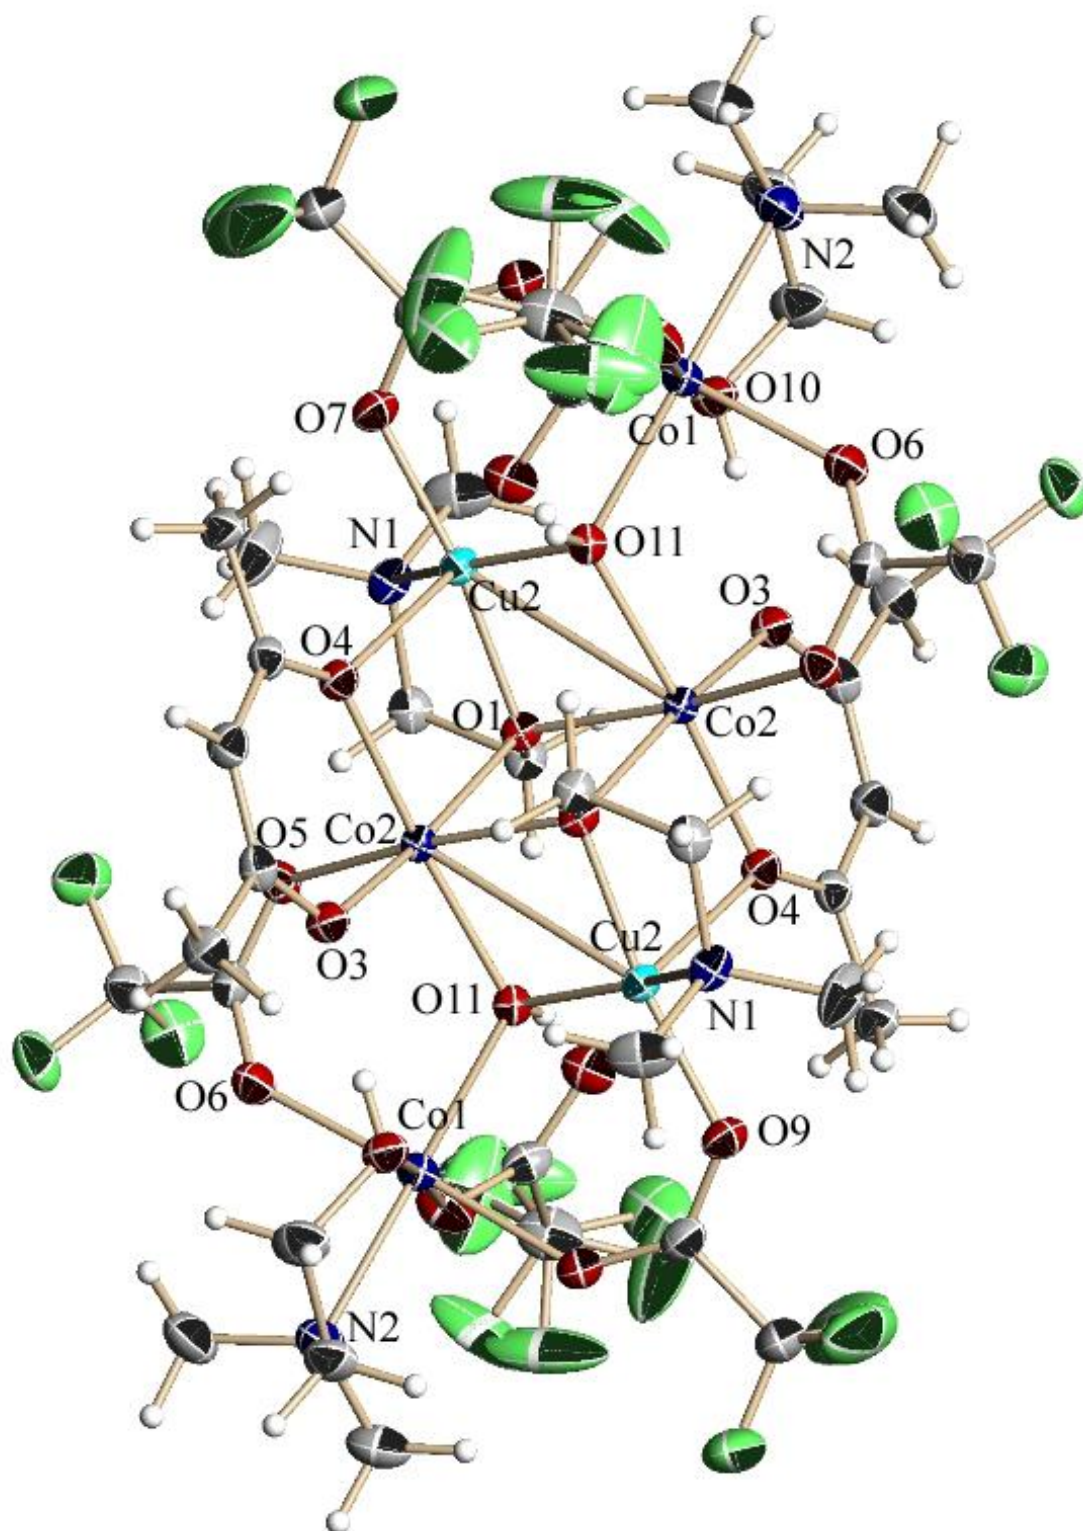

**Fig. S1.** ORTEP-style drawing showing the molecular structure of  $[\text{Cu}_2\text{Co}_4(\text{acac})_2(\text{dmae})_2(\text{dmaeH})_2(\text{OH})_2(\text{TFA})_6]$  (**2**).

Thermal ellipsoids are at the 50% probability level.

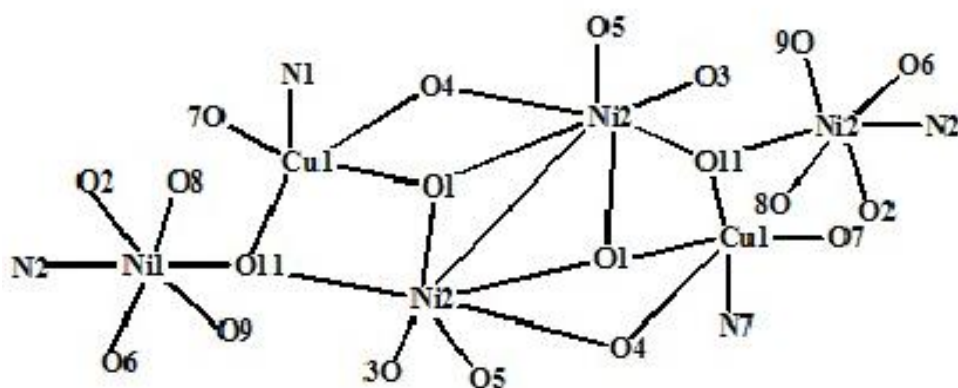

Fig. S2: Chemdraw sketch of M-O central core of  $[\text{Cu}_2\text{Ni}_4(\text{acac})_2(\text{dmae})_2(\text{dmaeH})_2(\text{OH})_2(\text{TFA})_6]$  (2).

Table S1: Selected bond distances ( $\text{\AA}$ ) for complex (1) and (2). Symmetry operator (i):  $-x+1$ ,  $-y+1$ ,  $-z+1$ .

| Bond lengths ( $\text{\AA}$ ) for complex (1) |            | Bond lengths ( $\text{\AA}$ ) for complex (2) |            |
|-----------------------------------------------|------------|-----------------------------------------------|------------|
| Ni(1)-O(9)                                    | 2.0230(19) | Co(1)-O(9)                                    | 2.047(2)   |
| Ni(1)-O(11)                                   | 2.0658(17) | Co(1)-O(6)                                    | 2.099(2)   |
| Ni(1)-O(8)                                    | 2.0702(19) | Co(1)-O(11)                                   | 2.1011(18) |
| Ni(1)-O(2)                                    | 2.0745(19) | Co(1)-O(8)                                    | 2.107(2)   |
| Ni(1)-O(6)                                    | 2.0748(19) | Co(1)-O(2)                                    | 2.113(2)   |
| Ni(1)-N(2)                                    | 2.140(2)   | Co(1)-N(2)                                    | 2.175(2)   |
| Ni(2)-O(3)                                    | 2.0269(17) | Co(2)-O(4)                                    | 2.0562(18) |
| Ni(2)-O(4)                                    | 2.0269(17) | Co(2)-O(3)                                    | 2.0645(18) |
| Ni(2)-O(5)                                    | 2.0411(17) | Co(2)-O(5)                                    | 2.0740(18) |
| Ni(2)-O(11)                                   | 2.0650(17) | Co(2)-O(11)                                   | 2.0907(18) |
| Ni(2)-O(1)                                    | 2.0886(16) | Co(2)-O(1)                                    | 2.1259(17) |
| Ni(2)-O(1) <sup>i</sup>                       | 2.0954(16) | Co(2)-O(1) <sup>i</sup>                       | 2.1366(17) |
| Ni(2)-Cu(2)                                   | 2.9739(6)  | Co(2)-Cu(2)                                   | 3.0108(5)  |

|                         |            |                         |            |
|-------------------------|------------|-------------------------|------------|
| Cu(1)-O(7)              | 1.9422(18) | Cu(1)-O(7)              | 1.9460(19) |
| Cu(1)-O(11)             | 1.9493(16) | Cu(1)-O(11)             | 1.9529(17) |
| Cu(1)-O(1)              | 1.9608(16) | Cu(1)-O(1)              | 1.9548(18) |
| Cu(1)-N(1)              | 2.034(2)   | Cu(1)-N(1)              | 2.038(2)   |
| Cu(1)-O(4) <sup>i</sup> | 2.3725(17) | Cu(1)-O(4) <sup>i</sup> | 2.3936(18) |
| O(1)-Ni(2) <sup>i</sup> | 2.0954(16) | O(1)-Co(1) <sup>i</sup> | 2.1366(17) |
| O(4)-Cu(1) <sup>i</sup> | 2.3724(17) | O(4)-Cu(1) <sup>i</sup> | 2.3936(18) |

**Table S2:** Selected bond angles (°) for complex (1). Symmetry operator (i):  $-x+1$ ,  $-y+1$ ,  $-z+1$ .

|                  |           |                                |           |
|------------------|-----------|--------------------------------|-----------|
| O(9)-Ni(1)-O(11) | 97.09(7)  | O(4)-Ni(2)-O(1) <sup>i</sup>   | 83.23(7)  |
| O(9)-Ni(1)-O(8)  | 88.15(8)  | O(5)-Ni(2)-O(1) <sup>i</sup>   | 95.37(7)  |
| O(11)-Ni(1)-O(8) | 91.81(7)  | O(11)-Ni(2)-O(1) <sup>i</sup>  | 95.20(6)  |
| O(9)-Ni(1)-O(2)  | 174.26(8) | O(1)-Ni(2)-O(1) <sup>i</sup>   | 80.57(6)  |
| O(11)-Ni(1)-O(2) | 88.52(7)  | O(3)-Ni(2)-Cu(2)               | 85.96(5)  |
| O(8)-Ni(1)-O(2)  | 90.49(8)  | O(4)-Ni(2)-Cu(2)               | 136.22(5) |
| O(9)-Ni(1)-O(6)  | 88.60(8)  | O(5)-Ni(2)-Cu(2)               | 134.04(5) |
| O(11)-Ni(1)-O(6) | 91.13(7)  | O(11)-Ni(2)-Cu(2)              | 40.72(5)  |
| O(8)-Ni(1)-O(6)  | 175.87(8) | O(1)-Ni(2)-Cu(2)               | 41.10(4)  |
| O(2)-Ni(1)-O(6)  | 92.49(8)  | O(1) <sup>i</sup> -Ni(2)-Cu(2) | 93.29(5)  |

|                  |           |                                |           |
|------------------|-----------|--------------------------------|-----------|
| O(9)-Ni(1)-N(2)  | 91.67(9)  | O(7)-Cu(2)-O(11)               | 99.07(7)  |
| O(11)-Ni(1)-N(2) | 171.18(8) | O(7)-Cu(2)-O(1)                | 172.36(7) |
| O(8)-Ni(1)-N(2)  | 87.42(8)  | O(11)-Cu(2)-O(1)               | 87.31(7)  |
| O(2)-Ni(1)-N(2)  | 82.70(9)  | O(7)-Cu(2)-N(1)                | 89.79(8)  |
| O(6)-Ni(1)-N(2)  | 90.11(8)  | O(11)-Cu(2)-N(1)               | 155.93(8) |
| O(3)-Ni(2)-O(4)  | 89.86(7)  | O(1)-Cu(2)-N(1)                | 85.96(8)  |
| O(3)-Ni(2)-O(5)  | 92.85(7)  | O(7)-Cu(2)-O(4) <sup>1</sup>   | 97.92(7)  |
| O(4)-Ni(2)-O(5)  | 89.66(7)  | O(11)-Cu(2)-O(4) <sup>1</sup>  | 90.36(7)  |
| O(3)-Ni(2)-O(11) | 91.25(7)  | O(1)-Cu(2)-O(4) <sup>1</sup>   | 77.74(6)  |
| O(4)-Ni(2)-O(11) | 176.60(7) | N(1)-Cu(2)-O(4) <sup>1</sup>   | 110.66(8) |
| O(5)-Ni(2)-O(11) | 93.49(7)  | O(7)-Cu(2)-Ni(2)               | 142.47(6) |
| O(3)-Ni(2)-O(1)  | 91.94(7)  | O(11)-Cu(2)-Ni(2)              | 43.72(5)  |
| O(4)-Ni(2)-O(1)  | 95.70(7)  | O(1)-Cu(2)-Ni(2)               | 44.44(5)  |
| O(5)-Ni(2)-O(1)  | 172.82(7) | N(1)-Cu(2)-Ni(2)               | 122.41(6) |
| O(11)-Ni(2)-O1   | 81.06(7)  | O(4) <sup>1</sup> -Cu(2)-Ni(2) | 88.63(4)  |

**Table S3:** Selected bond angles (°) for complex (2). Symmetry operator (i):  $-x+1$ ,  $-y+1$ ,  
 $-z+1$ .

|                  |           |                                |           |
|------------------|-----------|--------------------------------|-----------|
| O(9)-Co(1)-O(6)  | 89.50(9)  | O(3)-Co(2)-O(1) <sup>i</sup>   | 167.52(7) |
| O(9)-Co(1)-O(11) | 96.31(8)  | O(5)-Co(2)-O(1) <sup>i</sup>   | 95.55(7)  |
| O(6)-Co(1)-O(11) | 91.46(7)  | O(11)-Co(2)-O(1) <sup>i</sup>  | 95.73(7)  |
| O(9)-Co(1)-O(8)  | 88.30(9)  | O(1)-Co(2)-O(1) <sup>i</sup>   | 80.52(7)  |
| O(6)-Co(1)-O(8)  | 176.84(8) | O(4)-Co(2)-Cu(2)               | 135.73(5) |
| O(11)-Co(1)-O(8) | 91.04(7)  | O(3)-Co(2)-Cu(2)               | 87.11(5)  |
| O(9)-Co(1)-O(2)  | 174.40(8) | O(5)-Co(2)-Cu(2)               | 133.19(6) |
| O(6)-Co(1)-O(2)  | 92.18(8)  | O(11)-Co(2)-Cu(2)              | 40.15(5)  |
| O(11)-Co(1)-O(2) | 88.99(7)  | O(1)-Co(2)-Cu(2)               | 40.30(5)  |
| O(8)-Co(1)-O(2)  | 89.80(8)  | O(1) <sup>i</sup> -Co(2)-Cu(2) | 93.14(5)  |
| O(9)-Co(1)-N(2)  | 93.50(9)  | O(7)-Cu(2)-O(11)               | 98.82(8)  |
| O(6)-Co(1)-N(2)  | 90.71(9)  | O(7)-Cu(2)-O(1)                | 172.27(8) |
| O(11)-Co(1)-N(2) | 169.97(9) | O(11)-Cu(2)-O(1)               | 87.59(7)  |
| O(8)-Co(1)-N(2)  | 87.16(9)  | O(7)-Cu(2)-N(1)                | 89.94(9)  |
| O(2)-Co(1)-N(2)  | 81.15(9)  | O(11)-Cu(2)-N(1)               | 155.39(8) |
| O(4)-Co(2)-O(3)  | 88.46(7)  | O(1)-Cu(2)-N(1)                | 85.88(8)  |

|                  |           |                                |           |
|------------------|-----------|--------------------------------|-----------|
| O(4)-Co(2)-O(5)  | 91.03(7)  | O(7)-Cu(2)-O(4) <sup>1</sup>   | 97.08(7)  |
| O(3)-Co(2)-O(5)  | 93.35(7)  | O(11)-Cu(2)-O(4) <sup>1</sup>  | 90.99(7)  |
| O(4)-Co(2)-O(11) | 175.64(7) | O(1)-Cu(2)-O(4) <sup>1</sup>   | 78.40(7)  |
| O(3)-Co(2)-O(11) | 92.50(7)  | N(1)-Cu(2)-O(4) <sup>1</sup>   | 110.82(8) |
| O(5)-Co(2)-O(11) | 93.16(7)  | O(7)-Cu(2)-Co(2)               | 142.23(6) |
| O(4)-Co(2)-O(1)  | 95.94(7)  | O(11)-Cu(2)-Co(2)              | 43.66(5)  |
| O(3)-Co(2)-O(1)  | 91.76(7)  | O(1)-Cu(2)-Co(2)               | 44.70(5)  |
| O(5)-Co(2)-O(1)  | 171.47(7) | N(1)-Cu(2)-Co(2)               | 122.50(7) |
| O(11)-Co(2)-O(1) | 79.79(7)  | O(4) <sup>1</sup> -Cu(2)-Co(2) | 89.19(4)  |

**Table S4:** Atomic % of element determined by EDX analysis of thin films deposited from complex (1) and (2) by AACVD

| Thin films deposited from complex (1) |                      |          |          |
|---------------------------------------|----------------------|----------|----------|
| Deposition Temperature                | Atomic % of elements |          |          |
|                                       | Copper               | Nickel   | Oxygen   |
| 350 °C                                | 17.33333             | 33.91667 | 48.75000 |
| 400 °C                                | 16.66667             | 33.75000 | 49.58333 |
| 450 °C                                | 16.41667             | 32.95833 | 50.62500 |
| 500 °C                                | 16.79167             | 33.45833 | 49.83333 |
| Thin films deposited from complex (2) |                      |          |          |
| Deposition Temperature                | Atomic % of elements |          |          |

|        | Copper   | Cobalt          | Oxygen          |
|--------|----------|-----------------|-----------------|
| 350 °C | 19.54545 | <i>37.72727</i> | <i>42.72727</i> |
| 400 °C | 18.63636 | <i>37.27273</i> | 44.09091        |
| 450 °C | 17.90909 | 35.95455        | 46.13636        |
| 500 °C | 18.31818 | 36.50000        | 45.27273        |
